# Supplementary material for: Decisive gene strategy on osteoarthritis: a comprehensive whole-literature based approach for conclusive gene targets
Source: publisher site journal article supplement (doi:10.18632/aging.206094), 2024-09-06
Supplement: Supplementary file [file aging-v16i17-206094-supplementary-material-SD2.pdf]

## SUPPLEMENTARY TABLES

**Supplementary Table 1. Search strategies.**

---

**Relevant text of polymorphisms**

1. genetic
2. genetic polymorphism
3. SNP
4. single nucleotide polymorphism
5. polymorphism
6. 1 or 2 or 3 or 4 or 5

**Relevant text of osteoporosis**

7. osteoarthritis
8. osteoarthritides
9. osteoarthrosis
10. osteoarthroses
11. arthritis, degenerative
12. arthritides, degenerative
13. degenerative arthritides
14. degenerative arthritis
15. arthrosis
16. arthroses
17. osteoarthrosis deformans
18. 7 or 8 or 9 or 10 or 11 or 12 or 13 or 14 or 15 or 16 or 17

**Relevant text of meta**

19. meta-analysis
20. meta
21. 19 or 20

**Combined (Final strategy)**

22. 6 and 18 and 21
- 

MeSH Browser: <http://www.nlm.nih.gov/mesh/MBrowser.html>

PubMed: <http://www.ncbi.nlm.nih.gov/pubmed>

Cochrane Library: <http://www.thecochranelibrary.com>

Embase: <https://www.embase.com>
